# Supplementary material for: Spectrum of Disease and Relation to Place of Exposure among Ill Returned Travelers
Source: Atypon-hosted journal article supplement (doi:10.1056/nejmoa051331), 2006-01-11
Supplement: nejm_freedman_119sa1.pdf [file nejm_freedman_119sa1.pdf]

## Supplementary Appendix

This appendix has been provided by the authors to give readers additional information about their work.

Supplement to: Freedman DO, Weld LH, Kozarsky PE, et al. Spectrum of disease and relation to place of exposure among ill returned travelers N Engl J Med 2006;354:119-30.

| <b>RESPIRATORY</b>                       |               |
|------------------------------------------|---------------|
| <b>Diagnosis</b>                         | <b>DxCode</b> |
| ALLERGIC RHINITIS                        | 278           |
| ANTHRAX, PULMONARY                       | 584           |
| ASTHMA                                   | 267           |
| BRONCHITIS, ACUTE                        | 113           |
| BRONCHITIS, CHRONIC                      | 384           |
| BRONCHOSPASM                             | 679           |
| CERUMEN                                  | 387           |
| EOSINOPHILIA, TROPICAL PULMONARY         | 141           |
| EUSTACHIAN TUBE DYSFUNCTION (ETD)        | 685           |
| HIGH ALTITUDE PULMONARY EDEMA            | 444           |
| INFLUENZA A                              | 332           |
| INFLUENZA B                              | 333           |
| INFLUENZA UNSPECIFIED                    | 334           |
| LARYNGITIS                               | 458           |
| LEGIONNAIRES' DISEASE                    | 615           |
| MYCOBACTERIUM TUBERCULOSIS, PULMONARY    | 209           |
| MYCOBACTERIUM, ATYPICAL                  | 230           |
| OTITIS (SEROUS)                          | 470           |
| OTITIS EXTERNA                           | 471           |
| OTITIS MEDIA, ACUTE                      | 183           |
| PERFORATION, TYMPANIC MEMBRANE           | 262           |
| PERITONSILLAR ABSCESS                    | 488           |
| PERTUSSIS                                | 642           |
| PHARYNGITIS, NON-STREPTOCOCCAL           | 658           |
| PHARYNGITIS, STREPTOCOCCAL               | 492           |
| PHARYNGITIS, UNSPECIFIED                 | 491           |
| PLEURAL EFFUSION                         | 284           |
| PLEURISY                                 | 495           |
| PNEUMONIA / ARDS                         | 496           |
| PNEUMONIA, ATYPICAL (DIFFUSE)            | 187           |
| PNEUMONIA, BACTERIAL (LOBAR)             | 188           |
| PNEUMONIA, FUNGAL                        | 639           |
| RESPIRATORY TRACT INF (UPPER)            | 191           |
| SEVERE ACUTE RESPIRATORY SYNDROME (SARS) | 729           |
| SINUSITIS, ACUTE                         | 201           |
| SINUSITIS, CHRONIC                       | 202           |
| TONSILLITIS                              | 358           |
| YERSINIA PESTIS, PNEUMONIC               | 582           |

| <b>FEBRILE/SYSTEMIC ILLNESS</b>                |               |
|------------------------------------------------|---------------|
| <b>Diagnosis</b>                               | <b>DxCode</b> |
| ABSCESS, PYOGENIC (NOT SKIN)                   | 259           |
| ADENITIS, LYMPHADENITIS                        | 367           |
| ARTHRITIS, SEPTIC                              | 531           |
| BABESIOSIS                                     | 725           |
| BACTEREMIA                                     | 108           |
| BARMAH FOREST VIRUS                            | 730           |
| BARTONELLA, BACILLIFORMIS                      | 587           |
| BARTONELLA, HENSELAE                           | 588           |
| BLASTOMYCOSIS                                  | 590           |
| BRUCELLOSIS, ACUTE                             | 114           |
| BRUCELLOSIS, CHRONIC                           | 592           |
| CAT SCRATCH DISEASE                            | 593           |
| CELLULITIS                                     | 235           |
| CHAGAS DISEASE, ACUTE                          | 675           |
| COCCIDIOMYCOSIS                                | 597           |
| CRYPTOCOCCOSIS                                 | 598           |
| CYTOMEGALOVIRUS                                | 119           |
| DENGUE (DHF, DSS)                              | 127           |
| DENGUE, UNCOMPLICATED                          | 128           |
| DIPHTHERIA                                     | 604           |
| EBOLA VIRUS                                    | 567           |
| EHRlichia                                      | 137           |
| ENDOCARDITIS                                   | 537           |
| EPSTEIN-BARR VIRUS                             | 242           |
| FAMILIAL MEDITERRANEAN FEVER                   | 252           |
| FEBRILE ILLNESS UNSPECIFIED (< 3 WEEKS)        | 409           |
| FEBRILE ILLNESS UNSPECIFIED (>=3 WEEKS)        | 151           |
| HANTAVIRUS                                     | 613           |
| HEMORRAGIC FEVER SYNDROME, ACUTE               | 568           |
| HISTOPLASMOSIS                                 | 614           |
| HIV, ACUTE INFECTION                           | 331           |
| LASSA FEVER                                    | 565           |
| LEPTOSPIRA                                     | 335           |
| LYME DISEASE, ARTHRITIS                        | 616           |
| MALARIA, DRUG RESISTANT, CHLOROQUINE RES- P.f. | 618           |
| MALARIA, DRUG RESISTANT, CHLOROQUINE RES- P.v. | 619           |
| MALARIA, DRUG RESISTANT, PRIMAQUINE RES- P.v.  | 620           |

| <b>FEBRILE/SYSTEMIC ILLNESS</b>                                     |               |
|---------------------------------------------------------------------|---------------|
| <b>Diagnosis</b>                                                    | <b>DxCode</b> |
| MALARIA, DRUG RESISTANT, QUININE RES- P.f.                          | 563           |
| MALARIA, MALARONE RESISTANT                                         | 697           |
| MALARIA, MEFLOROQUINE RESISTANT                                     | 735           |
| MALARIA, P. FALCIPARUM                                              | 175           |
| MALARIA, P. MALARIAE                                                | 176           |
| MALARIA, P. OVALE                                                   | 177           |
| MALARIA, P. VIVAX                                                   | 178           |
| MALARIA, SEVERE AND COMPLICATED, CEREBRAL                           | 336           |
| MALARIA, SEVERE AND COMPLICATED, NONCEREBRAL                        | 628           |
| MALARIA, SPECIES UNKNOWN                                            | 179           |
| MASTITIS                                                            | 224           |
| MEASLES                                                             | 507           |
| MELIOIDOSIS                                                         | 726           |
| MENINGOCOCCAL SEPSIS (NON-MENINGEAL)                                | 459           |
| MONONUCLEOSIS, OTHER                                                | 180           |
| MUMPS                                                               | 468           |
| MYCOBACTERIUM TUBERCULOSIS, DISSEMINATED/MILIARY                    | 625           |
| MYCOBACTERIUM TUBERCULOSIS, EXTRAPULMONARY                          | 211           |
| ORIENTIA, TSUTSUGAMUSHI (SCRUB TYPHUS)                              | 302           |
| PARACOCCIDIOIDOMYCOSIS                                              | 637           |
| PARVOVIRUS                                                          | 569           |
| PYOMYOSITIS                                                         | 254           |
| Q FEVER                                                             | 189           |
| Q FEVER                                                             | 189           |
| RASH, VIRAL EXANTHEM                                                | 623           |
| RELAPSING FEVER                                                     | 640           |
| RICKETTSIA, AKARI                                                   | 631           |
| RICKETTSIA, FELIS (FLEA-BORNE SPOTTED FEVER)                        | 733           |
| RICKETTSIA, OTHER                                                   | 306           |
| RICKETTSIA, PROWAZEKI (EPIDEMIC TYPHUS, LOUSE BORNE)                | 630           |
| RICKETTSIA, SPECIES UNKNOWN                                         | 303           |
| RICKETTSIA, TICK BORNE SPOTTED FEVER (TICK TYPHUS, RMSF, ATBF, MSF) | 732           |
| RICKETTSIA (NOW ORIENTIA), TSUTSUGAMUSHI                            | 302           |
| RICKETTSIA, TYPHI (FLEA-BORNE MURINE TYPHUS)                        | 734           |
| RIFT VALLEY FEVER                                                   | 643           |
| ROSEOLA                                                             | 549           |
| ROSS RIVER VIRUS                                                    | 575           |

| <b>FEBRILE/SYSTEMIC ILLNESS</b> |               |
|---------------------------------|---------------|
| <b>Diagnosis</b>                | <b>DxCode</b> |
| RUBELLA                         | 550           |
| SALMONELLA, PARATYPHI           | 632           |
| SALMONELLA, TYPHI               | 193           |
| SEPSIS (give species)           | 699           |
| SMALLPOX (VARIOLA MAJOR)        | 695           |
| TOXOPLASMA GONDII               | 206           |
| TUBERCULOSIS, ATYPICAL          | 223           |
| TULAREMIA                       | 696           |
| VARICELLA (CHICKEN POX)         | 526           |
| VIRAL SYNDROME                  | 219           |
| YELLOW FEVER                    | 566           |
| YERSINIA PESTIS, BUBONIC        | 564           |

| <b>GENITOURINARY</b>                   |               |
|----------------------------------------|---------------|
| <b>Diagnosis</b>                       | <b>DxCode</b> |
| CERVICITIS                             | 388           |
| CHANCROID                              | 595           |
| CHLAMYDIA, LYMPHOGRANULOMA VENEREUM    | 596           |
| CYSTITIS (NON INFECTIOUS)              | 312           |
| EPIDIDYMITIS                           | 408           |
| GENITAL ULCER                          | 611           |
| GONORRHEA                              | 612           |
| HEMATURIA                              | 686           |
| HERPES SIMPLEX                         | 442           |
| KIDNEY STONE/URINE STONE               | 448           |
| PELVIC INFLAMATORY DISEASE, ACUTE      | 185           |
| PELVIC INFLAMATORY DISEASE, CHRONIC    | 186           |
| PROSTATE ENLARGEMENT                   | 689           |
| PROSTATITIS, ACUTE                     | 703           |
| PROTEINURIA                            | 227           |
| PYELONEPHRITIS                         | 255           |
| RENAL FAILURE, ACUTE                   | 693           |
| RENAL FAILURE, CHRONIC                 | 694           |
| SCHISTOSOMIASIS, HUMAN SPECIES UNKNOWN | 351           |
| SCHISTOSOMIASIS, S. HEMATOBIIUM        | 196           |
| SEXUALLY TRANSMITTED DISEASE           | 513           |
| SYPHILIS                               | 356           |
| TRICHOMONAS VAGINALIS                  | 361           |

Diagnoses by Syndrome (Updated May 2004)

| <b>GENITOURINARY</b>       |               |
|----------------------------|---------------|
| <b>Diagnosis</b>           | <b>DxCode</b> |
| URETHRITIS, GONOCOCCAL     | 648           |
| URETHRITIS, NON GONOCOCCAL | 649           |
| URETHRITIS, UNSPECIFIED    | 214           |
| URINARY RETENTION          | 681           |
| URINARY TRACT INF, ACUTE   | 215           |
| VAGINITIS                  | 217           |
| WARTS, VENEREAL            | 647           |

| <b>DERMATOLOGIC</b>                               |               |
|---------------------------------------------------|---------------|
| <b>Diagnosis</b>                                  | <b>DxCode</b> |
| ALLERGIC REACTION                                 | 369           |
| ANTHRAX, CUTANEOUS                                | 560           |
| BITE, ANIMAL OTHER                                | 109           |
| BITE, BEAR                                        | 376           |
| BITE, CAT                                         | 377           |
| BITE, DOG                                         | 378           |
| BITE, HUMAN                                       | 380           |
| BITE, INSECT (STING)                              | 110           |
| BITE, INSECT SUPERINFECTED                        | 353           |
| BITE, MARINE (STING)                              | 111           |
| BITE, MONKEY                                      | 379           |
| BITE, SCORPION                                    | 381           |
| BITE, SPIDER                                      | 382           |
| BITE, TICK                                        | 308           |
| BURN                                              | 385           |
| CUTANEOUS LARVA MIGRANS                           | 123           |
| CYST (specify location)                           | 708           |
| ERYSIPELAS                                        | 142           |
| ERYTHEMA CHRONICUM MIGRANS                        | 174           |
| ERYTHEMA MULTIFORME                               | 145           |
| ERYTHEMA NODOSUM                                  | 321           |
| FROSTBITE                                         | 414           |
| FUNGAL INFECTION (Superficial/ Cutaneous mycosis) | 181           |
| GNATHOSTOMA                                       | 534           |
| HERPES ZOSTER                                     | 290           |
| IMPETIGO                                          | 245           |
| LEISHMANIA, CUTANEOUS                             | 171           |
| LEISHMANIA, MUCOCUTANEOUS                         | 221           |

| <b>DERMATOLOGIC</b>                                  |               |
|------------------------------------------------------|---------------|
| <b>Diagnosis</b>                                     | <b>DxCode</b> |
| LEPROSY                                              | 173           |
| LICE                                                 | 545           |
| MITES                                                | 319           |
| MOLE                                                 | 457           |
| MOLLUSCUM CONTAGIOSUM                                | 467           |
| MYIASIS                                              | 182           |
| NEURODERMATOSIS                                      | 341           |
| PARONYCHIA                                           | 486           |
| PILONIDAL CYST                                       | 493           |
| PRURITIS, UNKNOWN ORIGIN                             | 347           |
| PSORIASIS                                            | 345           |
| RABIES, POST EXPOSURE PROPHYLAXIS                    | 190           |
| RASH, ALLERGIC                                       | 368           |
| RASH, CERCARIAL                                      | 116           |
| RASH, CONTACT DERMATITIS                             | 396           |
| RASH, FUNGAL                                         | 415           |
| RASH, HEAT INDUCED                                   | 622           |
| RASH, PETECHIAL                                      | 490           |
| RASH, PHOTO                                          | 131           |
| RASH, SEA BEATHERS ERUPTION                          | 199           |
| RASH, SWIMMERS ITCH                                  | 195           |
| RASH, UNKNOWN ETIOLOGY                               | 130           |
| RASH, URTICARIAL                                     | 216           |
| SCABIES                                              | 194           |
| SCRATCH, MONKEY                                      | 509           |
| SEBACEOUS CYST, ACNE, ROSACEA                        | 510           |
| SKIN ABCESS (e.g. furuncle, carbuncle, folliculitis) | 413           |
| SKIN INFECTION, SUPERFICIAL (INFECTED WOUND)         | 711           |
| SKIN ULCER (BACTERIAL, NOT INSECT BITE)              | 717           |
| SPOROTRICHOSIS                                       | 638           |
| TUMOR, BENIGN SUPERFICIAL                            | 718           |
| TUNGIASIS                                            | 212           |
| WART                                                 | 528           |
| YAWS                                                 | 719           |

Diagnoses by Syndrome (Updated May 2004)

| <b>PSYCHOLOGIC</b>                 |               |
|------------------------------------|---------------|
| <b>Diagnosis</b>                   | <b>DxCode</b> |
| ANXIETY REACTION                   | 273           |
| CYCLIC VOMITING SYNDROME           | 276           |
| DELUSIONAL PARASITOSIS             | 126           |
| DEPRESSION                         | 129           |
| ENURESIS                           | 257           |
| INSOMNIA                           | 447           |
| JET LAG                            | 169           |
| POST TRAUMATIC STRESS DISORDER     | 225           |
| PSYCHOSIS, NON MEFLUQUINE          | 504           |
| STRESS                             | 241           |
| SUBSTANCE ABUSE (DRUG AND ALCOHOL) | 720           |
| VIOLENCE EXPOSURE                  | 678           |

| <b>CHRONIC DIARRHEA</b>              |               |
|--------------------------------------|---------------|
| <b>Diagnosis</b>                     | <b>DxCode</b> |
| COLITIS, ULCERATIVE                  | 311           |
| CROHN'S DISEASE                      | 283           |
| DIARRHEA, CHRONIC UNKNOWN            | 133           |
| IRRITABLE BOWEL, POST INFECTIOUS     | 167           |
| IRRITABLE BOWL SYNDROME              | 712           |
| LACTOSE INTOLERANCE, POST INFECTIOUS | 170           |
| MALABSORPTION                        | 234           |
| SPRUE, TROPICAL                      | 253           |

| <b>ACUTE DIARRHEA</b>                                        |               |
|--------------------------------------------------------------|---------------|
| <b>Diagnosis</b>                                             | <b>DxCode</b> |
| AMEBIASIS, E.histolytica, AMEBOMA                            | 103           |
| AMEBIASIS, E.histolytica, DIARRHEA                           | 270           |
| AMEBIASIS, E.histolytica, DYSENTERY                          | 104           |
| AMEBIASIS, OTHER, (E. hartmani, E. nana, E. coli, E. dispar) | 106           |
| CAMPYLOBACTER                                                | 115           |
| CHOLERA                                                      | 535           |
| COLITIS, C. DIFFICILE                                        | 275           |
| CRYPTOSPORIDIUM                                              | 122           |
| CYCLOSPORA                                                   | 124           |
| DIARRHEA, ACUTE BACTERIAL                                    | 314           |
| DIARRHEA, ACUTE PARASITIC                                    | 602           |
| DIARRHEA, ACUTE UNSPECIFIED                                  | 132           |

| <b>ACUTE DIARRHEA</b>        |               |
|------------------------------|---------------|
| <b>Diagnosis</b>             | <b>DxCode</b> |
| DIARRHEA, ACUTE VIRAL        | 603           |
| DIENTAMEBIASIS (D. FRAGILIS) | 134           |
| DYSENTERY, UNKNOWN ETIOLOGY  | 374           |
| FOOD POISONING               | 525           |
| GASTROENTERITIS              | 287           |
| GIARDIA                      | 157           |
| ISOSPORA                     | 168           |
| SALMONELLA, OTHER            | 192           |
| SHIGELLA, S. boydii          | 635           |
| SHIGELLA, S. dysenteriae     | 633           |
| SHIGELLA, S. flexneri        | 634           |
| SHIGELLA, S. sonnei          | 200           |
| YERSINIA SPECIES, NON-PESTIS | 220           |

| <b>OTHER GASTROINTESTINAL</b>             |               |
|-------------------------------------------|---------------|
| <b>Diagnosis</b>                          | <b>DxCode</b> |
| AMEBIASIS, E.histolytica, EXTRAINTESTINAL | 105           |
| ANISAKIS                                  | 583           |
| APPENDICITIS                              | 680           |
| ASCARIS, INTESTINAL                       | 107           |
| CELIAC DISEASE                            | 721           |
| CHOLANGITIS, NO PARASITIC INFECTION       | 554           |
| CHOLECYSTITIS                             | 710           |
| CHOLELITHIASIS,                           | 271           |
| CLONORCHIS                                | 118           |
| COLONIC POLYPOSIS                         | 723           |
| CONSTIPATION                              | 120           |
| DIVERTICULITIS                            | 709           |
| DYSPEPSIA                                 | 237           |
| ECHINOCOCCOSIS, HEPATIC                   | 606           |
| ENTEROBIAISIS (PINWORM)                   | 139           |
| ESOPHAGEAL MOTILITY DISORDER              | 277           |
| ESOPHAGITIS                               | 289           |
| FASCIOLA                                  | 324           |
| GASTRITIS, ACUTE                          | 156           |
| GASTRITIS, CHRONIC                        | 251           |
| GASTRITIS, H.PYLORI (-)                   | 327           |
| GASTRITIS, H.PYLORI (+)                   | 326           |

| <b>OTHER GASTROINTESTINAL</b>                    |               |
|--------------------------------------------------|---------------|
| <b>Diagnosis</b>                                 | <b>DxCode</b> |
| GASTRO INTESTINAL BLEEDING                       | 682           |
| GERD                                             | 702           |
| HELMINTH, INTESTINAL (NOT DIARRHEA), UNSPECIFIED | 714           |
| HEMORRHOIDS                                      | 439           |
| HEPATIC STEATOSIS                                | 281           |
| HEPATITIS A, ACUTE                               | 159           |
| HEPATITIS B CARRIER, ASYMPTOMATIC                | 677           |
| HEPATITIS B, ACUTE                               | 160           |
| HEPATITIS B, CHRONIC                             | 328           |
| HEPATITIS C, ACUTE                               | 329           |
| HEPATITIS C, CHRONIC                             | 161           |
| HEPATITIS DELTA                                  | 330           |
| HEPATITIS E                                      | 162           |
| HEPATITIS, ACUTE UNSPECIFIED                     | 163           |
| HEPATITIS, CHRONIC UNSPECIFIED                   | 538           |
| HERNIA                                           | 440           |
| HETEROPHYES HETEROPHYES INFECTION                | 559           |
| HOOKWORM (A. duodenale, N. americana)            | 166           |
| NAUSEA, VOMITING                                 | 722           |
| PAIN, ABDOMINAL                                  | 286           |
| PANCREATITIS                                     | 700           |
| PARASITE, INTESTINAL (NOT DIARRHEA), UNSPECIFIED | 716           |
| PEPTIC ULCER DISEASE, H.PYLORI (-)               | 343           |
| PEPTIC ULCER DISEASE, H.PYLORI (+)               | 342           |
| PEPTIC ULCER DISEASE, UNSPECIFIED                | 279           |
| PERFORATED ULCER                                 | 487           |
| PERITONITIS                                      | 698           |
| PROTOZOA, INTESTINAL(NOT DIARRHEA), UNSPECIFIED  | 715           |
| RECTAL BLEEDING                                  | 505           |
| RECTAL FISSURE                                   | 506           |
| SCHISTOSOMIASIS, S. JAPONICUM                    | 197           |
| SCHISTOSOMIASIS, S. MANSONI                      | 198           |
| SCOMBROID, POISONING                             | 645           |
| STRONGYLOIDES, SIMPLE INTESTINAL                 | 203           |
| TAPEWORM, D. LATUM                               | 672           |
| TAPEWORM, H. NANA                                | 204           |
| TAPEWORM, T. SAGINATA                            | 655           |
| TAPEWORM, T. SOLIUM                              | 304           |

| <b>OTHER GASTROINTESTINAL</b>  |               |
|--------------------------------|---------------|
| <b>Diagnosis</b>               | <b>DxCode</b> |
| TAPEWORM, UNSPECIFIED          | 300           |
| TRICHURIS TRICHIURA (WHIPWORM) | 208           |
| VIBRIO, NONCHOLERA             | 624           |

| <b>NEUROLOGIC</b>                           |               |
|---------------------------------------------|---------------|
| <b>Diagnosis</b>                            | <b>DxCode</b> |
| ACUTE MOUNTAIN SICKNESS (AMS)               | 366           |
| ATAXIA                                      | 373           |
| BOTULISM                                    | 591           |
| CEREBROVASCULAR ACCIDENT (CVA)              | 394           |
| CIGUATERA INTOXICATION                      | 310           |
| ENCEPHALITIS, ACUTE                         | 138           |
| ENCEPHALITIS, CHRONIC                       | 608           |
| ENCEPHALITIS, JAPANESE                      | 609           |
| ENCEPHALITIS, TICK BORNE                    | 610           |
| ENCEPHALITIS, MURRAY VALLEY                 | 731           |
| GUILLAIN BARRE                              | 247           |
| HEADACHE, MIGRAINE                          | 265           |
| HEARING LOSS                                | 258           |
| HIGH ALTITUDE CEREBRAL EDEMA                | 443           |
| LYME DISEASE, CHRONIC (e.g. neurologic)     | 617           |
| MENIERE'S DISEASE                           | 463           |
| MENINGITIS, BACTERIAL OTHER                 | 460           |
| MENINGITIS, EOSINOPHILIC                    | 653           |
| MENINGITIS, FREE LIVING AMOEBIA             | 652           |
| MENINGITIS, FUNGAL                          | 654           |
| MENINGITIS, H. flu                          | 651           |
| MENINGITIS, MENINGOCOCCAL                   | 461           |
| MENINGITIS, MYCOBACTERIUM                   | 676           |
| MENINGITIS, PNEUMOCOCCAL                    | 650           |
| MENINGITIS, VIRAL                           | 462           |
| MYCOBACTERIUM TUBERCULOSIS, CNS TUBERCULOMA | 626           |
| NEUROCYSTICERCOSIS                          | 125           |
| NEUROPATHY, PERIPHERAL                      | 484           |
| PAPILLEDEMA                                 | 483           |
| POISONING, NEUROTOXIC SHELLFISH             | 644           |
| POISONING, PARALYTIC SHELLFISH              | 646           |
| POLYNEURITIS OF UNKNOWN ORIGIN              | 344           |

Diagnoses by Syndrome (Updated May 2004)

| <b>NEUROLOGIC</b>               |               |
|---------------------------------|---------------|
| <b>Diagnosis</b>                | <b>DxCode</b> |
| RABIES                          | 349           |
| SEIZURE DISORDER                | 285           |
| TETANUS                         | 641           |
| TINNITUS                        | 357           |
| TRANSIENT ISCHEMIC ATTACK (TIA) | 687           |
| TRIGEMINAL NEURALGIA            | 268           |
| VERTIGO                         | 365           |
| WEST NILE VIRUS                 | 713           |

| <b>INJURY AND MUSCULOSKELETAL</b> |               |
|-----------------------------------|---------------|
| <b>Diagnosis</b>                  | <b>DxCode</b> |
| ABRASION                          | 690           |
| ARTHRITIS, NONSEPTIC              | 532           |
| BONY ABNORMALITY                  | 266           |
| BURSITIS                          | 386           |
| CARPEL TUNNEL SYNDROME            | 256           |
| CONTUSION                         | 392           |
| DISLOCATED SHOULDER               | 402           |
| FIBROMYALGIA                      | 704           |
| FOREIGN BODY                      | 683           |
| FX ARM                            | 416           |
| FX CLAVICLE                       | 417           |
| FX COCCYX                         | 418           |
| FX ELBOW                          | 419           |
| FX FIBULA                         | 420           |
| FX FINGER                         | 421           |
| FX FOOT                           | 422           |
| FX LEG                            | 423           |
| FX OTHER                          | 424           |
| FX RADIAL                         | 425           |
| FX RIB                            | 426           |
| FX WRIST                          | 427           |
| HEAD INJURY                       | 432           |
| HEMATOMA                          | 438           |
| INGROWN TOENAIL                   | 446           |
| LACERATION FACE                   | 449           |
| LACERATION FINGER                 | 450           |
| LACERATION HAND                   | 451           |

| <b>INJURY AND MUSCULOSKELETAL</b> |               |
|-----------------------------------|---------------|
| <b>Diagnosis</b>                  | <b>DxCode</b> |
| LACERATION HEAD                   | 452           |
| LACERATION LEG                    | 453           |
| LACERATION LIP                    | 454           |
| LACERATION OTHER                  | 455           |
| LACERATION SCALP                  | 456           |
| PAIN, BACK                        | 473           |
| PAIN, KNEE                        | 475           |
| PAIN, LEG                         | 476           |
| PAIN, NECK                        | 477           |
| PAIN, SHOULDER                    | 478           |
| PLANTAR FASCIITIS                 | 494           |
| SCIATICA                          | 508           |
| SPRAIN/STRAIN, ANKLE              | 548           |
| SPRAIN/STRAIN, ARM                | 515           |
| SPRAIN/STRAIN, ELBOW              | 511           |
| SPRAIN/STRAIN, KNEE               | 512           |
| SPRAIN/STRAIN, MUSCLE             | 517           |
| SPRAIN/STRAIN, RIB CAGE           | 518           |
| SPRAIN/STRAIN, OTHER              | 692           |
| SUTURE REMOVAL                    | 520           |
| TENDINITIS                        | 522           |
| TMJ SYNDROME                      | 524           |
| TRAUMA OR INJURY, MISCELLANEOUS   | 724           |

| <b>HEALTHY</b>   |               |
|------------------|---------------|
| <b>Diagnosis</b> | <b>DxCode</b> |
| HEALTHY          | 184           |

| <b>ADVERSE EVENTS TO MEDICATION OR VACCINE</b>   |               |
|--------------------------------------------------|---------------|
| <b>Diagnosis</b>                                 | <b>DxCode</b> |
| DRUG ADVERSE RXN, NON MEFLOQUINE                 | 135           |
| MEFLOQUINE INTOLERANCE, NEUROPSYCHIATRIC, MILD   | 480           |
| MEFLOQUINE INTOLERANCE, NEUROPSYCHIATRIC, SEVERE | 503           |
| MEFLOQUINE INTOLERANCE, OTHER                    | 337           |
| RASH, DRUG RELATED                               | 323           |
| VACCINE ADVERSE EVENT                            | 691           |

Diagnoses by Syndrome (Updated May 2004)

| <b>CHRONIC DISEASE</b>                       |               |
|----------------------------------------------|---------------|
| <b>Diagnosis</b>                             | <b>DxCode</b> |
| AIDS                                         | 101           |
| CANCER                                       | 249           |
| CANCER, BREAST                               | 544           |
| CANCER, COLON                                | 309           |
| CANCER, HEMATOLOGIC                          | 574           |
| CEREBRAL PALSY                               | 272           |
| CHRONIC OBSTRUCTIVE PULMONARY DISEASE (COPD) | 393           |
| CIRRHOSIS                                    | 390           |
| CONNECTIVE TISSUE DISEASE, UNSPECIFIED       | 674           |
| DIABETES                                     | 397           |
| FIBROID                                      | 412           |
| G6PD DEFICIENT                               | 578           |
| GOUT                                         | 430           |
| HIV - ASYMPTOMATIC                           | 164           |
| LUPUS                                        | 539           |
| MULTIPLE SCLEROSIS                           | 246           |
| PARKINSON'S DISEASE                          | 485           |
| REITER'S SYNDROME                            | 350           |
| SCOLIOSIS                                    | 579           |
| THALASSEMIA                                  | 705           |
| THYROID DISEASE                              | 263           |
| TUBERCULOSIS, POSITIVE PPD                   | 210           |
| VARICOCELE                                   | 581           |

| <b>NONSPECIFIC SYMPTOMS OR FINDINGS</b> |               |
|-----------------------------------------|---------------|
| <b>Diagnosis</b>                        | <b>DxCode</b> |
| ALOPECIA (HAIR LOSS)                    | 370           |
| ANEMIA                                  | 269           |
| ANTIBIOTIC RESISTANT BACTERIA           | 585           |
| ARTHRALGIA                              | 288           |
| CHEMICAL INTOXICATION                   | 553           |
| DEHYDRATION                             | 571           |
| DIZZINESS                               | 403           |
| EDEMA                                   | 320           |
| EOSINOPHILIA                            | 140           |
| FAILURE TO THRIVE (all ages)            | 148           |
| FATIGUE < 1 MONTH                       | 149           |
| FATIGUE >=1 MONTH                       | 150           |

| <b>NONSPECIFIC SYMPTOMS OR FINDINGS</b> |               |
|-----------------------------------------|---------------|
| <b>Diagnosis</b>                        | <b>DxCode</b> |
| HEADACHE                                | 158           |
| HEPATOMEGALY                            | 280           |
| LYMPHADENOPATHY                         | 282           |
| LYMPHEDEMA                              | 572           |
| METABOLIC DISORDER                      | 543           |
| MICRONUTRIENT DEFICIENCY                | 707           |
| MYALGIA                                 | 248           |
| PAIN, CHEST                             | 232           |
| PALPITATIONS                            | 479           |
| PROTEIN-CALORIE MALNUTRITION            | 706           |
| SPLENOMEGALY                            | 355           |
| SYNCOPE                                 | 521           |
| WEIGHT LOSS                             | 529           |

| <b>OPHTHALMOLOGIC</b>          |               |
|--------------------------------|---------------|
| <b>Diagnosis</b>               | <b>DxCode</b> |
| CHLAMYDIA TRACHOMATIS (OCULAR) | 359           |
| CONJUNCTIVITIS                 | 391           |
| EYE DISEASE, CHRONIC           | 727           |
| POOR VISION                    | 260           |
| STY                            | 519           |
| VISUAL LOSS                    | 688           |

| <b>ASYMPTOMATIC PARASITE INFECTION</b> |               |
|----------------------------------------|---------------|
| <b>Diagnosis</b>                       | <b>DxCode</b> |
| AMEBIASIS, ASYMPTOMATIC                | 102           |
| BLASTOCYSTIS Sp.                       | 112           |
| CHILOMASTIX MESNILI                    | 577           |
| TRICHOMONAS INTESTINALIS               | 360           |

| <b>CARDIOVASCULAR</b>          |               |
|--------------------------------|---------------|
| <b>Diagnosis</b>               | <b>DxCode</b> |
| AUTOIMMUNE DISORDERS           | 673           |
| CONGESTIVE HEART FAILURE (CHF) | 389           |
| HEART DISEASE, ANGINA          | 433           |
| HEART DISEASE, ATRIAL FIB      | 434           |
| HEART DISEASE, ATRIAL FLUTTER  | 435           |
| HEART DISEASE, HEART MURMUR    | 542           |

| <b>CARDIOVASCULAR</b>                |               |
|--------------------------------------|---------------|
| <b>Diagnosis</b>                     | <b>DxCode</b> |
| HEART DISEASE, MYOCARDIAL INFARCTION | 436           |
| HEART DISEASE, OTHER                 | 580           |
| HEART DISEASE, TACHYCARDIA           | 437           |
| HYPERTENSION                         | 264           |
| MYOCARDITIS                          | 656           |
| PERICARDITIS                         | 489           |
| PULMONARY EMBOLISM                   | 346           |
| THROMBOPHELEBITIS (DVT)              | 405           |
| VARICOSE VEINS                       | 527           |

| <b>TISSUE PARASITE</b>                    |               |
|-------------------------------------------|---------------|
| <b>Diagnosis</b>                          | <b>DxCode</b> |
| ANGIOSTRONGYLIASIS                        | 728           |
| ASCARIS, EXTRAINTESTINAL                  | 586           |
| CHAGAS DISEASE, CHRONIC                   | 117           |
| CYSTICERCOSIS (MUSCULAR, CUTANEOUS)       | 600           |
| ECHINOCOCCOSIS, HEPATIC and NON-HEPATIC   | 605           |
| ECHINOCOCCOSIS, NON-HEPATIC               | 607           |
| FILARIA, BANCROFTI                        | 153           |
| FILARIA, LOA LOA                          | 154           |
| FILARIA, ONCHOCERCIASIS                   | 152           |
| FILARIA, OTHER                            | 155           |
| FILARIA, SPECIES UNKNOWN                  | 325           |
| LEISHMANIA, VISCERAL                      | 172           |
| STRONGYLOIDES, HYPERINFECTION SYNDROME    | 636           |
| TRICHINELLA                               | 207           |
| TRYPANOSOMIASIS, AFRICAN (T. gambiense)   | 671           |
| TRYPANOSOMIASIS, AFRICAN (T. rhodesiense) | 363           |
| VISCERAL LARVA MIGRANS                    | 205           |

| <b>LOST TO FOLLOW UP</b> |               |
|--------------------------|---------------|
| <b>Diagnosis</b>         | <b>DxCode</b> |
| LOST TO F/U              | 570           |

| <b>OB/GYN</b>    |               |
|------------------|---------------|
| <b>Diagnosis</b> | <b>DxCode</b> |
| AMENORRHEA       | 371           |
| BIRTH CONTROL    | 375           |

| <b>OB/GYN</b>                  |               |
|--------------------------------|---------------|
| <b>Diagnosis</b>               | <b>DxCode</b> |
| BREAST LUMP                    | 383           |
| DYSFUNCTIONAL UTERINE BLEEDING | 404           |
| ECTOPIC PREGNANCY              | 406           |
| ENDOMETRITIS                   | 407           |
| FERTILITY EVALUATION           | 410           |
| FIBROCYSTIC BREASTS            | 411           |
| HORMONE REPLACEMENT THERAPY    | 445           |
| MENOPAUSE                      | 464           |
| MENORRHAGIA                    | 465           |
| MISCARRIAGE                    | 466           |
| OVARIAN CYST                   | 472           |
| PREGNANCY                      | 244           |
| PREMENSTRUAL SYNDROME          | 684           |
| PROLAPSE, UTERINE              | 501           |

| <b>DENTAL</b>    |               |
|------------------|---------------|
| <b>Diagnosis</b> | <b>DxCode</b> |
| DENTAL CARIES    | 226           |
| DENTAL, OTHER    | 556           |
| EPISTAXIS        | 701           |
| GINGIVITIS       | 428           |
| GLOSSITIS        | 429           |
| STOMATITIS       | 514           |
| THRUSH           | 523           |

| <b>UNKNOWN DIAGNOSIS</b> |               |
|--------------------------|---------------|
| <b>Diagnosis</b>         | <b>DxCode</b> |
| UNKNOWN DIAGNOSIS        | 533           |

| <b>DEATH</b>     |               |
|------------------|---------------|
| <b>Diagnosis</b> | <b>DxCode</b> |
| DEATH            | 601           |

| <b>SCREENING/EDUCATION, WORKING DIAGNOSIS ONLY</b> |               |
|----------------------------------------------------|---------------|
| <b>Diagnosis</b>                                   | <b>DxCode</b> |
| EDUCATION, HEALTH                                  | 502           |
| PHYSICAL EXAMINATION, ADULT                        | 401           |
| PHYSICAL EXAMINATION, CHILD                        | 400           |
| SCREENING FOR TRAVEL RELATED ILLNESS               | 146           |
